# Supplementary material for: Influence of Socio-Economic and Psychosocial Profiles on the Human Breast Milk Bacteriome of South African Women
Source: MDPI journal article supplement (doi:10.3390/nu11061390), 2019-06-20
Supplement: s1 [file s1]

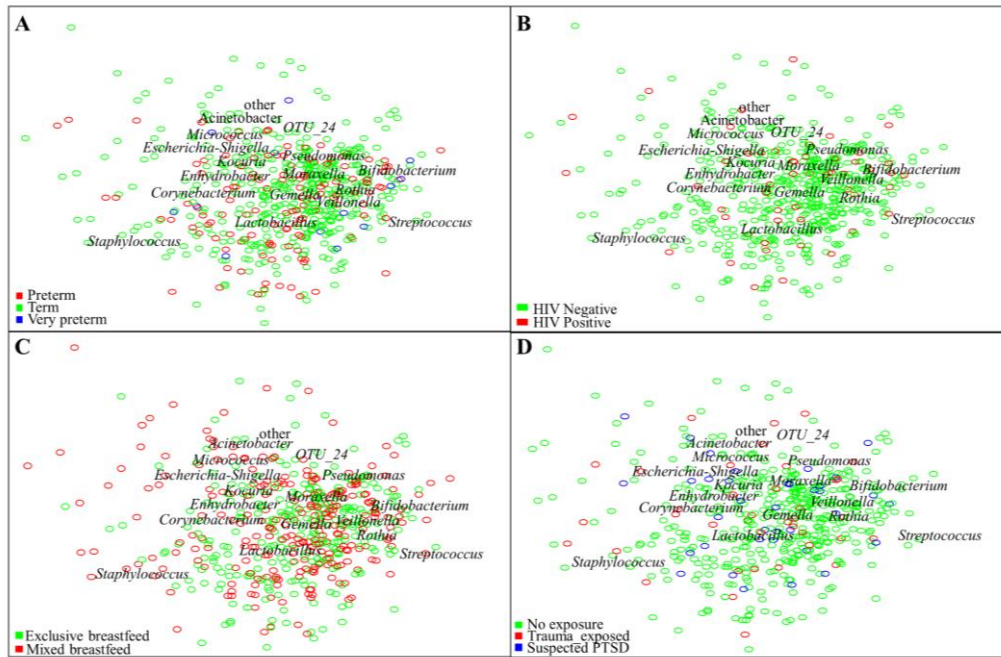

**Figure S5.** Log ratio biplot of human breast milk bacterial abundances at the genus level. Samples are colored according to **(A)** gestational age, **(B)** maternal smoking, **(C)** Body Mass Index (BMI), and **(D)** delivery mode. Each sample is represented by a circle and is colored based on group type. Samples (circles) that cluster together are similar in bacteria composition and abundance.
