# Supplementary material for: Influence of Socio-Economic and Psychosocial Profiles on the Human Breast Milk Bacteriome of South African Women
Source: MDPI journal article supplement (doi:10.3390/nu11061390), 2019-06-20
Supplement: s1 [file s1]

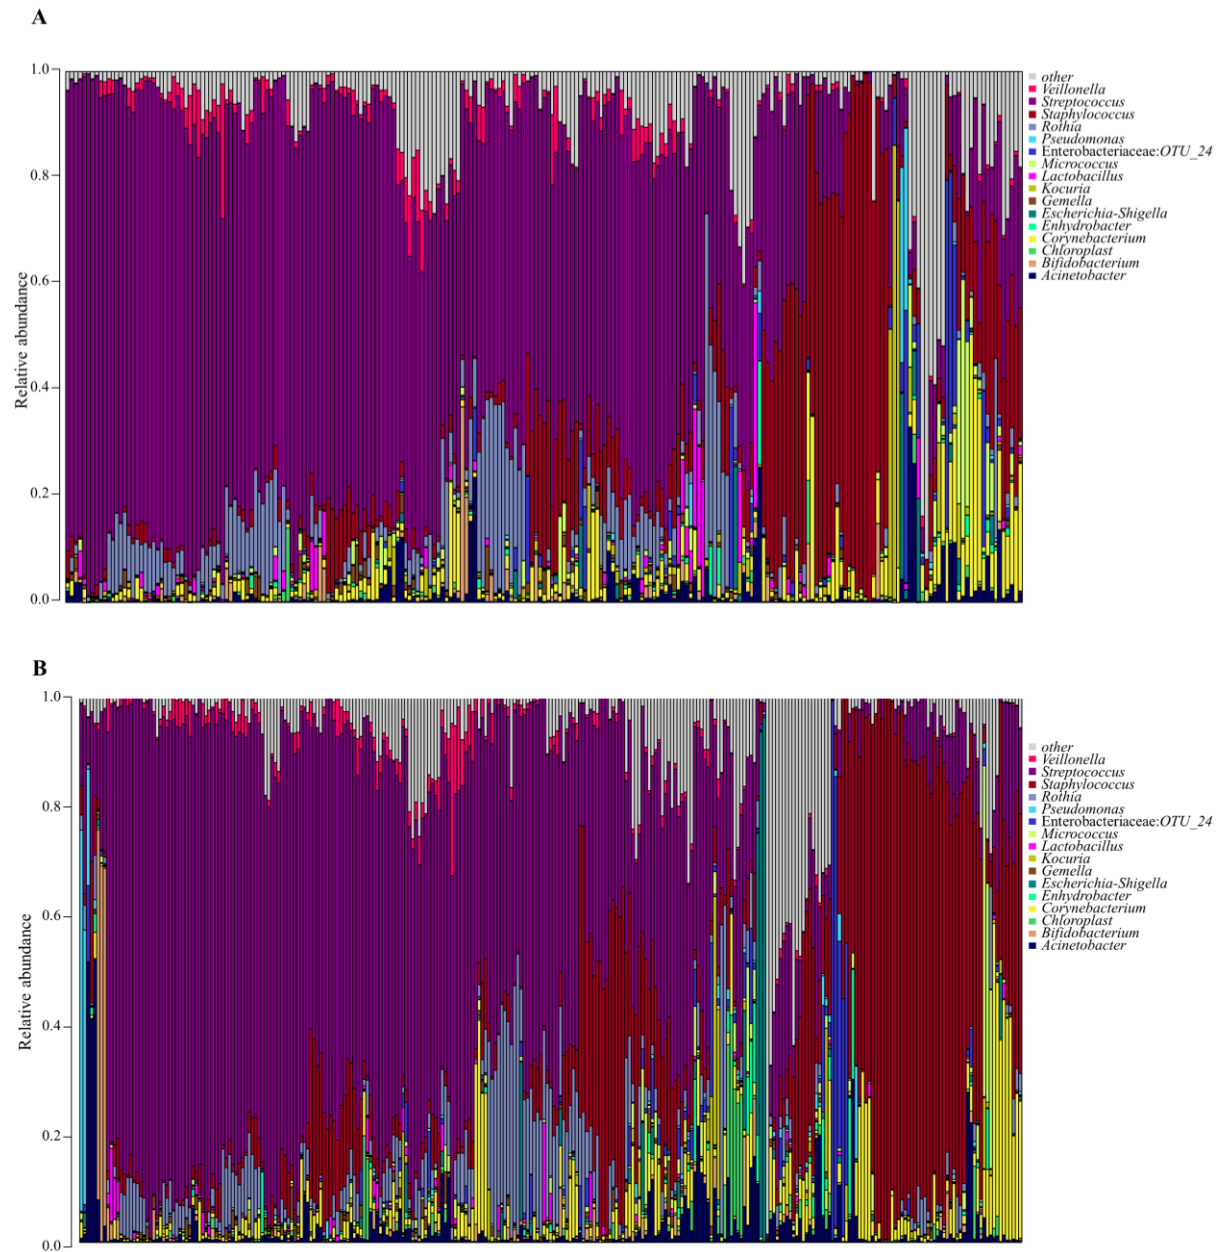

**Figure S3.** Bar-plot of relative abundances of bacteria genera. **(A)** Complete linkage unsupervised hierarchical clustering of bacterial abundances within the human breast milk bacteriome at Mbekweni study site (n =235). **(B)** Complete linkage unsupervised hierarchical clustering of bacterial abundances within the human breast milk bacteriome at TC Newman study site (n =287). Each bar represents a mother’s HBM bacteriome profile and each coloured box, a bacterial genus. Genera with less than 0.5% abundance in a given sample are grouped together, herein referred to as “other” (grey boxes).
