# Supplementary material for: Influence of Socio-Economic and Psychosocial Profiles on the Human Breast Milk Bacteriome of South African Women
Source: MDPI journal article supplement (doi:10.3390/nu11061390), 2019-06-20
Supplement: s1 [file s1]

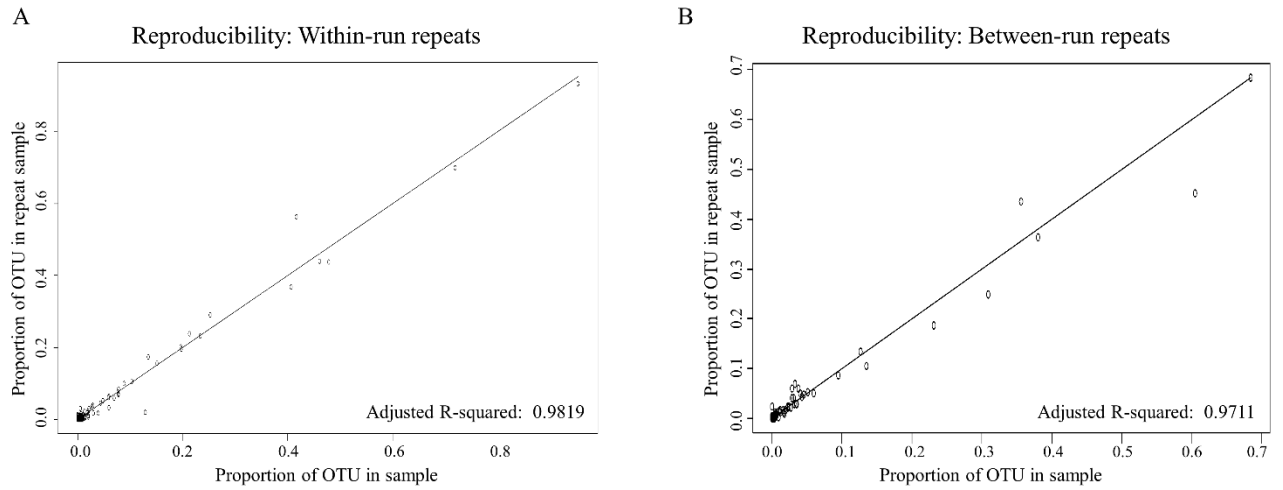

**Figure S7.** 16S rRNA gene sequencing reproducibility. Scatter plots represent the relative abundance of each OTU from **(A)** seven within-run repeats and **(B)** four between-run repeats together with their technical repeats. A multiple R-square which is the proportion of variance reproduced by replicating the reads is generated.
