# Supplementary material for: Influence of Socio-Economic and Psychosocial Profiles on the Human Breast Milk Bacteriome of South African Women
Source: Nutrients. 2019 Jun 20;11(6):1390. doi: 10.3390/nu11061390 (PMC6627120; doi:10.3390/nu11061390)
Supplement: Supplementary file 1 [file nutrients-11-01390-s001.zip › Supplementary tables.xlsx]

## Sheet: Table S1
Table S1: Demographic and clinical characteristics of mothers and their infants
	Mbekweni	TC Newman	Both study sites
Maternal demographic and psychosocial characteristics
Maternal age at enrolment (years),	25.5 [18.5 39.5]	25.3 [18.7 39.6]	25.3 [18.6 39.6]
median [95%CI]
Maternal weight (kg), median [95%CI]	68.1 [48 110.6]	59.5 [42.7 95.3]	63.7 [43.7 102.3]
Maternal BMI, median [95%CI]	26.7 [19.1 41.1]	23.6 [17.6 37.7]	25 [17.9 40.6]
Lactation stage (weeks), median [range]	7.7 [5.3 19.5]	7.4 [2.4 18.7]	7.5 [2.4 19.5]
Ethnicity, n (%)
Black African	244 (99.2%)	0 (0.0%)	244 (44.0%)
Mixed ancestry	2 (0.8%)	308 (100.0%)	310 (56.0%)
Maternal education, n (%)
Primary	152 (61.8%)	191 (62.0%)	343 (61.9%)
Secondary	72 (29.3%)	102 (33.1%)	174 (31.4%)
Tertiary	22 (8.9%)	15 (4.9%)	37 (6.7%)
Mother employed, n(%)	56 (22.8%)	79 (25.6%)	134 (24.4%)
Household income, n (%)
<ZAR1000/m	126 (51.2%)	99 (32.1%)	225 (40.6%)
>ZAR5000/m	17 (6.9%)	58 (18.8%)	75 (13.5%)
ZAR1000-5000/m	103 (41.9%)	151 (49.0%)	254 (45.8%)
HIV infected mothers, n(%)	46 (18.7%)	6 (1.9%)	52 (9.4%)
Maternal smoking status, n (%)
Active smoker	30 (12.9%)	154 (51.9%)	184 (34.8%)
Non-smoker	81 (34.9%)	30 (10.1%)	111 (21.0%)
Passive smoker	121 (52.2%)	112 (38.0%)	234 (44.2%)
Infant feeding at 6-10 weeks, n (%)
Exclusive breastfeeding	131 (54.8%)	155 (51.2%)	286 (52.8%)
Mixed breastfeeding	108 (45.2%)	148 (48.8%)	256 (47.2%)
Exclusive breastfeeding at 4 months, n (%)	66 (27.5%)	82 (27.0%)	148 (27.2%)
Mode of delivery, n (%)
Elective C/S	18 (7.4%)	16 (5.2%)	34 (6.2%)
Emergency C/S	37 (15.2%)	34 (11.0%)	71 (12.9%)
Vaginal	189 (77.5%)	258 (83.8%)	447 (81.0%)
Maternal PTSD, n (%)
No exposure	178 (83.6%)	243 (86.2%)	421 (85.1%)
Suspected PTSD	20 (9.4%)	16 (5.7%)	36 (7.3%)
Trauma exposed	15 (7.0%)	23 (8.2%)	38 (7.7%)
Maternal BDI Threshold, n (%)
Above threshold	49 (22.5%)	77 (27.3%)	126 (25.2%)
Below threshold	169 (77.5%)	205 (72.7%)	374 (74.8%)
Maternal SRQ Threshold, n (%)
Above threshold	41 (18.7%)	71 (25.2%)	112 (22.4%)
Below threshold	178 (81.3%)	211 (74.8%)	389 (77.6%)
Household size, median [95%CI]	4 [1 11]	5 [2 12]	5 [2 12]
Maternal alcohol score, median [95%CI]	0 [0 30.2]	0 [0 25.9]	0 [0 26]
Infant characteristics
Infant weight for age z-score, median [95%CI]	-0.36 [-2.5 1.86]	-0.74 [-2.92 1.06	-0.6 [-2.81 1.62]
Infant height for age z-score, median [95%CI]	0.1 [-3.44 2.74]	-0.27 [-3.44 2.11]	0 [-3.4 2.6]
Infant gestational age, n (%)
Preterm	55 (22.4%)	71 (23.1%)	126 (22.7%)
Term	184 (74.8%)	230 (74.7%)	414 (74.7%)
Very preterm	7 (2.8%)	7 (2.3%)	14 (2.5%)
Infant gender, n (%)
Female	122 (49.6%)	143 (46.6%)	265 (47.8%)
Male	123 (50.0%)	165 (53.6%)	288 (52.0%)
Triplets	1 (0.4%)	0 (0.0%)	1 (0.2%)
BMI=Body Mass Index; HIV= Human Immunodeficiency Virus; EBF=Exclusive breastfeeding; PTSD= post-traumatic stress disorder; BDI= Beck Depression Inventory; SRQ= Self-Regulation Questionnaire; Smoking status was measured as Active smoker (cotinine levels ≥ 500); Passive smoker (cotinine levels 10 – 500); Non-smoker (cotinine levels ≤ 10). Term, Preterm and Very-preterm infants are infant with gesta…

## Sheet: Table S2
Table S2: Core taxa in human breast milk bacteriome.
Phylum	Class	Order	Family	Genus	OTU	MRA of taxa in the cohort	Percentage of women with specific taxa (%)
Firmicutes	Bacilli	Bacillales	Staphylococcaceae	Staphylococcus	OTU_18	0.177	99.8
Firmicutes	Bacilli	Lactobacillales	Streptococcaceae	Streptococcus	OTU_20	0.222	99.6
Firmicutes	Bacilli	Lactobacillales	Streptococcaceae	Streptococcus	OTU_1	0.262	96.4
Firmicutes	Clostridia	Clostridiales	Veillonellaceae	Veillonella	OTU_33	0.015	84.5
Firmicutes	Bacilli	Lactobacillales	Streptococcaceae	Streptococcus	OTU_1557	0.002	83.3
Firmicutes	Bacilli	Bacillales	Family_XI_Incertae_Sedis	Gemella	OTU_42	0.006	83.3
Firmicutes	Bacilli	Lactobacillales	Streptococcaceae	Streptococcus	OTU_2110	0.001	82
Actinobacteria	Actinobacteria	Corynebacteriales	Corynebacteriaceae	Corynebacterium	OTU_34	0.012	98.3
Actinobacteria	Actinobacteria	Micrococcales	Micrococcaceae	Rothia	OTU_38	0.059	94.1
Actinobacteria	Actinobacteria	Corynebacteriales	Corynebacteriaceae	Corynebacterium	OTU_30	0.015	92.9
Actinobacteria	Actinobacteria	Micrococcales	Micrococcaceae	Micrococcus	OTU_41	0.013	92.5
Actinobacteria	Actinobacteria	Corynebacteriales	Corynebacteriaceae	Corynebacterium	OTU_113	0.003	84.9
Proteobacteria	Gammaproteobacteria	Pseudomonadales	Moraxellaceae	Acinetobacter	OTU_35	0.013	92.1
Proteobacteria	Gammaproteobacteria	Enterobacteriales	Enterobacteriaceae	unclassified	OTU_24	0.02	86.2
Core taxa in human breast milk bacteriome at different taxonomy levels. Core is defined by the presence of taxa found in HBM from 80% of all mothers enrolled in the study. MRA=Mean relative abundance.

## Sheet: Table S3
Table S3: Mean relative abundance of dominant phyla and genera (>0.5%) across phenotypic clusters in HBM samples.
	Cluster 1	Cluster 2	Cluster 3	p-value
Shannon diversity	1.07	1.65	1.23	< 0.001
Chao1 index	128.84	155.96	174.44	< 0.001
Phylum
Firmicutes	79.16	68.04	79.62	< 0.001
Actinobacteria	10.93	18.22	14.1	< 0.001
Proteobacteria	9	10.66	5.14	< 0.001
Cyanobacteria	0.43	2.51	0.43	< 0.001
Genus
Staphylococcus	70.8	32.89	5.62	< 0.001
Streptococcus	6	31.16	68.91	< 0.001
Rothia	0.99	7.24	7.72	< 0.001
Corynebacterium	6.16	5.57	2.45	< 0.001
Acinetobacter	2.17	2.58	1.28	0.0144
Chloroplast	0.4	2.5	0.35	< 0.001
Micrococcus	1.01	1.49	0.73	0.057
OTU_24	2.75	1.43	0.6	< 0.001
Enhydrobacter	0.91	1.42	0.23	< 0.001
Escherichia-Shigella	0.36	1.38	0.3	< 0.001
Lactobacillus	0.1	1.08	0.95	0.101
Bifidobacterium	0.7	0.81	0.71	0.956
Veillonella	0.16	0.71	2.47	< 0.001
Kocuria	0.39	0.52	0.45	< 0.001
Gemella	0.12	0.44	0.74	< 0.001
Pseudomonas	0.47	0.28	0.13	< 0.001
The generated p-values for Shannon diversity indices and taxa abundances were generated by Anova test in stats package of R.

## Sheet: Table S4
Table S4: Mean Shannon diversity of HBM bacteriome profiles across different socio-economic and psychosocial factors.
	Shannon diversity						Chao1 index
	All samples		Mbekweni clinic		TC Newman clinic		All samples		Mbekweni clinic		TC Newman clinic
Covariates	Mean Shannon diversity	p-value	Mean Shannon diversity	p-value	Mean Shannon diversity	p-value	Mean Chao1 index	p-value	Mean Chao1 index	p-value	Mean Chao1 index	p-value
Study site (Ethniciy)		0.535		-		-		0.401		-		-
Mbekweni	1.343		-		-		159.25		-		-
TC Newman	1.3882		-		-		169.33		-		-
Mode of delivery		0.337		0.527		0.602		0.971		0.754		0.452
Vaginal	1.3649		1.3287		1.3925		164.22		158.2		168.81
Elective CS	1.5284		1.5303		1.526		181.72		166.62		198.82
Emergency CS	1.3219		1.3486		1.2945		162.11		164.43		159.71
Gestational age		0.492		0.201		0.5		0.552		0.428		0.415
Term	1.3655		1.3713		1.3606		163.4		157.97		167.85
Pre-term	1.3773		1.2808		1.4565		170.6		166.11		174.29
Very pre-term	1.3492		1.0337		1.6121		149.47		128.42		167.02
Infant gender		0.886		0.388		0.386		0.725		0.036*		0.085
Male	1.3697		1.3594		1.3777		162.34		160.46		163.8
Female	1.3651		1.3243		1.4004		167.46		157.89		175.74
Infant feeding options		0.575		0.991		0.995		0.569		0.681		0.906
Exclusive BF	1.3799		1.3434		1.4111		167.01		159.01		173.74
Mixed BF	1.3519		1.3409		1.3602		161.72		158.15		164.44
Maternal education		0.236		0.404		0.247		0.044*		0.057		0.077
Primary	1.3724		1.3454		1.3946		172.11		163.41		179.32
Secondary	1.3661		1.3326		1.3895		153.58		156.98		151.19
Tertiary	1.3371		1.3587		1.3053		151.51		138.82		170.09
Maternal employment		0.277		0.459		0.423		0.744		0.863		0.929
Working	1.4339		1.3209		1.4399		169.12		163.1		173.09
Not working	1.3468		1.4247		1.3696		163.42		158.21		167.98
Maternal BMI		0.667		0.443		0.645		0.29		0.776		0.11
0-18.5	1.333		1.563		1.3089		149.33		116.78		152.76
18.5-25	1.3521		1.3006		1.3877		162.93		162.92		162.95
25-30	1.3585		1.4047		1.3138		168.5		166.41		170.52
30-50	1.4453		1.4138		1.4825		172.95		156.52		192.33
Infant birth weight	kg	0.346		0.929		0.264		0.246		0.689		0.196
0-2.5	1.3297		1.3525		1.3176		159.11		158.12		159.63
2.5-4.5	1.3738		1.395		1.4042		165.86		159.83		171.19
Infant birth length	cm	0.041*		0.934		0.012*		0.002**		0.205		0.0009**
0-40	1.4105		1.13		1.7844		204.49		196.35		215.36
40-48	1.4229		1.4023		1.4343		172.16		165.58		175.78
48-60	1.3502		1.3365		1.3632		161.22		157.59		164.67
Maternal age	years	0.036*		0.032*		0.454		0.63		0.884		0.541
17-22	1.3151		1.2956		1.3306		156.8		152.38		160.29
22-35	1.3667		1.3106		1.4128		166.33		159.09		172.28
35-45	1.5333		1.6809		1.3976		176.21		178.5		174.1
Dwelling type		0.249		0.705		0.329		0.209		0.881		0.365
Shack	1.3556		1.3156		1.5876		163.29		157.3		198.04
House	1.3974		1.3653		1.4429		164.03		158.16		172.36
Flat	1.3076		1.5755		1.3026		157.45		197.12		156.7
Backyard	1.3378		1.05		1.3648		179.72		171.12		180.53
Marital status		0.791		0.887		0.904		0.891		0.229		0.623
Living together	1.3732		1.37		1.3752		170.89		158.39		178.6
Not living together	1.3639		1.3281		1.3987		160.76		159.62		161.87
Household income		0.807		0.548		0.98		0.278		0.883		0.115
>R5000/m	1.4479		1.5093		1.4315		162.26		168.27		160.65
R1000-5000/m	1.377		1.351		1.3948		170.35		157.45		179.13
<R1000/m	1.33		1.3161		1.3496		159.22		159.58		158.71
Maternal HIV status		0.379		0.247		0.779		0.686		0.133		0.345
Negative	1.3594		1.3151		1.3898		164.74		158.99		168.71
Positive	1.453		1.4737		1.3118		165.32		160.47		198.51
Household size		0.473		0.133		0.814		0.743		0.474		0.604
1-5	1.346		1.2882		1.3988		166.01		157.53		173.76
5-10	1.3951		1.436		1.3667		161.39		161.64		161.22
10-17	1.5016		1.6911		1.4069		172.31		175.33		170.79
Maternal smoking		0.644		0.877		0.585		0.274		0.136		0.762
Non-smoker	1.3395		1.3213		1.3937		156.78		153.33		167.01
Passive smoker	1.3241		1.318		1.3306		162.3		162.12		162.22
Active smoker	1.4403		1.4714		1.4341		173.44		158.97		170.79
Alcohol score		0.948		0.707		0.672		0.046*		0.177		0.183
0-10.5	1.3635		1.3409		1.3829		166.36		161.11		170.87
10.5-20.5	1.4996		1.0649		1.5589		153.01		105.01		159.55
20.5-35	1.3106		1.4172		1.2395		152.7		136.9		163.24
Maternal PTSD		0.384		0.307		0.961		0.218		0.096		0.634
No exposure	1.3562		1.3404		1.3681		163.13		155.69		168.74
Trauma exposed	1.2782		1.1243		1.3719		158.68		154.95		160.88
Suspected PTSD	1.6087		1.5046		1.7607		189.87		185.66		196.01
Maternal BDI		0.574		0.854		0.902		0.012*		0.607		0.096
Above threshold	1.4243		1.3946		1.4438		181.08		176.08		184.37
Below thresold	1.3457		1.3293		1.3663		159.19		153.89		163.65
Maternal SRQ		0.211		0.188		0.428		0.185		0.839		0.259
Above threshold	1.4483		1.4413		1.4525		165.64		146.57		177.26
Below thresold	1.3457		1.3208		1.3663		164.49		161.7		166.88
IPV emotional		0.665		0.479		0.649		0.526		0.295		0.708
High frequency	1.3841		1.3841		1.3833		182.05		171.94		187.26
Mid frequency	1.4525		1.4914		1.4328		155.83		139.14		164.3
Low frequency	1.2767		1.3451		1.2617		169.62		147.43		174.48
Isolated incident	1.4684		1.3786		1.5266		162		165.81		159.52
No IPV	1.3134		1.2893		1.3457		164.91		161.9
IPV physical		0.469		0.588		0.409		0.601		0.040*		0.758
High frequency	1.4313		1.3046		1.52		182.91		172.59		190.13
Mid frequency	1.4453		1.4484		1.443		168.77		167.39		169.8
Low frequency	1.3738		1.2747		1.4061		166.03		120.41		181.23
Isolated incident	1.3899		1.3068		1.455		159.1		142.96		171.73
No IPV	1.3174		1.3273		1.3081		162.29		163.03
IPV sexual		0.158		0.862		0.171		0.797		0.751		0.7
High frequency	1.4313		1.5165		1.7469		193.97		192.08		194.92
Mid frequency	1.4168		1.3348		1.4384		169.62		193.39		163.36
Low frequency	0.884		0.436		0.7263		153.31		184.83		144.31
Isolated incident	1.3825		1.4398		1.3604		170.55		133.94		184.64
No IPV	1.366		1.3354		1.3932		163.65		157.76		168.89
BMI=Body Mass Index; HIV= Human Immunodeficiency Virus; EBF=Exclusive breastfeeding; PTSD= post-traumatic stress disorder; BDI= Beck Depression Inventory; SRQ= Self-Regulation Questionnaire; CS=Caeserean section. P<0.001,***; p<0.01,**; p<0.05*.

## Sheet: Table S5
Table S5: Pearson’s correlations between the relative abundances of the predominant bacterial genera in the human breast milk samples.
All samples (n=522)
	Acinetobacter	Bifidobacterium	Chloroplast	Corynebacterium	Enhydrobacter	Escherichia-Shigella	Gemella	Kocuria	Lactobacillus	Micrococcus	OTU_24	Pseudomonas	Rothia	Staphylococcus	Streptococcus	Veillonella
Acinetobacter	1
Bifidobacterium	-0.12	1
Chloroplast	0.07	-0.09	1
Corynebacterium	-0.06	-0.08	0.06	1
Enhydrobacter	0.3	-0.16	0.02	0.01	1
Escherichia-Shigella	0.07	-0.06	-0.09	-0.15	0.02	1
Gemella	-0.3	-0.03	-0.1	-0.1	-0.2	-0.25	1
Kocuria	-0.09	-0.12	-0.11	0.04	-0.04	-0.11	-0.13	1
Lactobacillus	-0.19	0.01	0	-0.09	-0.19	-0.02	-0.08	-0.07	1
Micrococcus	0.08	0	-0.17	0.11	0.19	-0.12	-0.09	0.13	-0.12	1
OTU_24	0.19	-0.15	-0.07	-0.12	0.03	0.42	-0.25	0.01	-0.14	-0.07	1
Pseudomonas	0.34	-0.19	0.16	-0.09	0.06	0.15	-0.3	-0.12	-0.1	-0.09	0.26	1
Rothia	-0.25	-0.09	-0.19	-0.21	-0.22	-0.23	0.17	-0.09	-0.14	-0.16	-0.3	-0.26	1
Staphylococcus	-0.12	-0.11	-0.03	0.4	0.05	-0.04	-0.13	0.07	-0.07	-0.02	-0.02	-0.02	-0.25	1
Streptococcus	-0.32	-0.01	-0.14	-0.27	-0.32	-0.25	0.39	-0.16	0.12	-0.3	-0.37	-0.28	0.48	-0.33	1
Veillonella	-0.25	0.05	-0.15	-0.21	-0.27	-0.3	0.26	-0.16	-0.05	-0.18	-0.33	-0.24	0.37	-0.34	0.49	1
Cluster 1 (n=65)
	Acinetobacter	Bifidobacterium	Chloroplast	Corynebacterium	Enhydrobacter	Escherichia-Shigella	Gemella	Kocuria	Lactobacillus	Micrococcus	OTU_24	Pseudomonas	Rothia	Staphylococcus	Streptococcus	Veillonella
Acinetobacter	1
Bifidobacterium	0.0621114	1
Chloroplast	-0.129039	-0.0792675	1
Corynebacterium	-0.184139	0.0185937	0.0554672	1
Enhydrobacter	0.309945	-0.231277	-0.0312595	-0.127944	1
Escherichia-Shigella	-0.105596	-0.180789	-0.295626	0.037752	0.0637241	1
Gemella	-0.407144	-0.18408	0.0217063	0.0107351	-0.0975372	-0.167163	1
Kocuria	-0.0645701	0.0080136	-0.084091	-0.0392392	-0.0347716	0.101424	-0.0596028	1
Lactobacillus	-0.184804	-0.0985426	0.0769613	0.118569	-0.144834	-0.000442693	0.096002	-0.109312	1
Micrococcus	0.226685	-0.0411678	-0.168169	-0.095337	0.34943	0.00378854	-0.204046	-0.0429479	-0.0268267	1
OTU_24	0.0642131	0.00770746	-0.13281	-0.0164018	-0.114285	0.311469	-0.319992	0.104343	-0.182931	-0.200436	1
Pseudomonas	0.318631	-0.121577	-0.233827	-0.151284	0.0472743	0.0724872	-0.278833	-0.138001	-0.0588131	-0.0742744	0.0114835	1
Rothia	-0.246328	-0.118043	-0.0303171	-0.324357	-0.288016	-0.211067	0.177844	-0.238849	-0.247093	-0.170298	-0.257817	-0.0125527	1
Staphylococcus	-0.415369	-0.0329028	0.114787	0.173138	-0.290964	-0.13955	0.134644	0.00186569	0.151523	-0.175577	-0.159042	-0.196326	0.10865	1
Streptococcus	-0.246199	-0.151038	-0.0156233	-0.158976	-0.222719	-0.22178	0.319262	-0.389045	-0.0135098	-0.316413	-0.298629	-0.0708812	0.568042	0.0223849	1
Veillonella	-0.104253	-0.0267387	-0.120354	-0.213009	-0.27386	-0.304997	0.154539	-0.105485	-0.0235376	-0.0612687	-0.178851	-0.00124504	0.229598	-0.0455251	0.287542	1
Cluster 2 (n=68)
	Acinetobacter	Bifidobacterium	Chloroplast	Corynebacterium	Enhydrobacter	Escherichia-Shigella	Gemella	Kocuria	Lactobacillus	Micrococcus	OTU_24	Pseudomonas	Rothia	Staphylococcus	Streptococcus	Veillonella
Acinetobacter	1
Bifidobacterium	-0.219325	1
Chloroplast	0.101592	-0.140291	1
Corynebacterium	-0.269412	-0.384459	0.0374136	1
Enhydrobacter	0.481301	-0.399867	-0.0827307	-0.141961	1
Escherichia-Shigella	0.161127	0.178745	-0.185357	-0.314603	-0.0789796	1
Gemella	-0.407467	0.043283	-0.0290998	0.0948043	-0.219405	-0.274574	1
Kocuria	-0.213793	0.0227331	-0.113037	-0.0331224	-0.0945591	-0.182462	-0.148564	1
Lactobacillus	-0.054718	0.0567928	0.0406818	-0.0119525	-0.223811	-0.0959187	-0.0446962	0.0509592	1
Micrococcus	-0.0385682	0.17152	-0.425008	-0.0177069	0.103199	0.112197	-0.22386	0.331567	0.00189987	1
OTU_24	0.513447	-0.103304	-0.101841	-0.327228	0.229886	0.392479	-0.405891	-0.346722	-0.195512	0.0976751	1
Pseudomonas	0.328978	-0.173963	0.475481	-0.148954	0.141446	-0.0816673	-0.249781	-0.0878	0.0617564	-0.323942	0.230973	1
Rothia	-0.136456	-0.111688	-0.0490254	0.104104	-0.01513	-0.00385585	-0.08391	0.0660274	-0.422783	-0.108479	-0.230087	-0.291839	1
Staphylococcus	-0.571105	-0.149706	-0.267118	0.332651	-0.239951	-0.382045	0.420579	0.00891915	0.0287488	-0.207193	-0.26698	-0.236515	-0.0782504	1
Streptococcus	-0.409816	-0.0701257	-0.183242	0.0563512	-0.277429	-0.267706	0.298469	-0.050955	0.0243833	-0.334803	-0.230602	-0.266409	0.133073	0.636211	1
Veillonella	-0.266137	0.175154	-0.223882	0.0872032	-0.204459	-0.0988488	0.167041	-0.0501677	-0.281143	-0.129249	-0.274334	-0.317692	0.189405	0.112066	0.212917	1
Cluster 3 (n=319)
	Acinetobacter	Bifidobacterium	Chloroplast	Corynebacterium	Enhydrobacter	Escherichia-Shigella	Gemella	Kocuria	Lactobacillus	Micrococcus	OTU_24	Pseudomonas	Rothia	Staphylococcus	Streptococcus	Veillonella
Acinetobacter	1
Bifidobacterium	-0.162029	1
Chloroplast	0.0533981	-0.0868541	1
Corynebacterium	-0.0469954	-0.0709295	0.0111019	1
Enhydrobacter	0.172084	-0.13541	0.0270928	-0.0210292	1
Escherichia-Shigella	0.106619	-0.0555813	-0.100567	-0.0981057	0.0283405	1
Gemella	-0.199997	-0.0292225	-0.0732484	-0.0625712	-0.141947	-0.243595	1
Kocuria	-0.0881025	-0.135519	-0.15445	-0.0508173	-0.0640261	-0.112188	-0.11795	1
Lactobacillus	-0.177776	0.022887	0.0260727	-0.0763679	-0.0930259	-0.0558741	-0.204568	-0.0723315	1
Micrococcus	0.0590089	-0.0309434	-0.123847	0.0109323	0.172064	-0.154402	-0.0020324	0.0594414	-0.151717	1
OTU_24	0.19875	-0.118987	-0.142401	-0.146487	-0.0172431	0.418567	-0.0533981	-0.0431716	-0.131155	-0.114733	1
Pseudomonas	0.288603	-0.14188	0.197726	-0.0818967	-0.0110172	0.110428	-0.180381	-0.148265	-0.0925451	-0.0575999	0.125434	1
Rothia	-0.231812	-0.129676	-0.180885	-0.0927825	-0.212461	-0.202059	-0.012354	0.0190845	-0.184278	-0.10966	-0.239781	-0.198117	1
Staphylococcus	-0.0932926	-0.204712	-0.113196	0.227891	-0.0153066	0.000911643	-0.0213878	0.0500179	-0.0283725	-0.049483	-0.0687912	-0.0922642	-0.142613	1
Streptococcus	-0.363942	-0.0612657	-0.0335001	-0.0861463	-0.286239	-0.188804	0.168004	-0.0348395	0.074687	-0.232409	-0.295361	-0.153643	0.284809	0.0243657	1
Veillonella	-0.219872	0.0011043	-0.168944	-0.0846751	-0.190113	-0.300279	0.101314	-0.0818401	-0.140063	-0.145442	-0.250226	-0.184629	0.252131	-0.191911	0.268133	1
Co-occurrences between the relative abundances of the sixteen most predominant bacteria genera. Negative and positive values represent negative and positive correlations respectively between the bacteria. Cut-off value was set to 0.28
