# Supplementary figures and images for: Influence of Socio-Economic and Psychosocial Profiles on the Human Breast Milk Bacteriome of South African Women
Source: MDPI journal article supplement (doi:10.3390/nu11061390), 2019-06-20

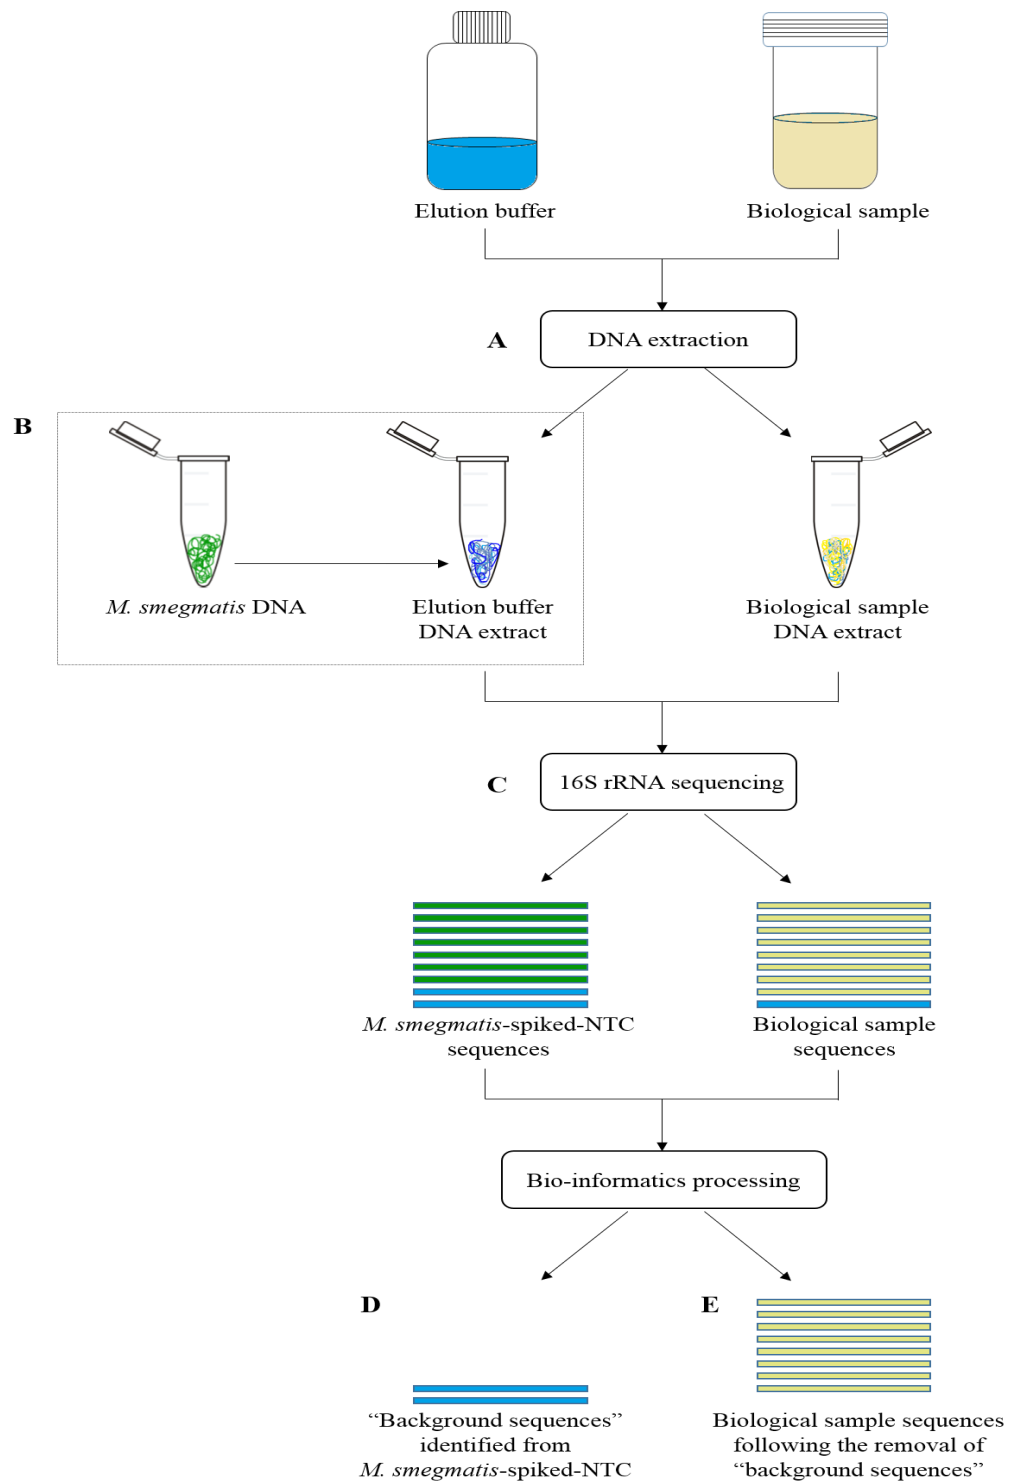

**Figure S1.** In-silico de-contamination of biological human breast milk samples.

Supplement: s1 [file s1]
